# Supplementary material
Source: PubMed Central journal article supplement (PMC3848438)
Supplement: Supp_Table1.pdf [file Supp_Table1.pdf]

SUPPLEMENTARY TABLE S1. REAL-TIME PRIMERS  
USED IN THIS STUDY

---

|             |                                |
|-------------|--------------------------------|
| Ascl1-F     | GAACTCTATGGCGGGTTCTC           |
| Ascl1-R     | CTGACAGAGAGTGGGAGGTG           |
| VGLUT1-F    | AGGAGGAGCGCAAATACATTGAGGATGCCA |
| VGLUT1-R    | TGATGGCATAGACGGGCATGGACGTAAAGA |
| Synapsin1-F | GGCCTACATGAGGACATCAG           |
| Synapsin1-R | ACCACAAGTTCCACGATGAG           |

---
